# Supplementary material
Source: publisher figshare collection journal article supplement (https://wellcome.figshare.com/ndownloader/files/17591126)
Supplement: Supplementary file 1 [file 17591126]

## Sheet: Overview Historic Pricing
Academic Institutions		Subscription Spends (Euro)				Total Authored articles (OA and paywalled)			2017 OA Authored Articles & Spend		2018 OA Authored Articles & Spend		2019 OA Authored Articles & Spend		Total Spends (Subscription + Hybrid and Full OA)
Ringgold		2017 Subscription Spend	2018 Subscription Spend	2019 Subscription Spend	Number of Subscribed Titles (2019)	2017	2018	2019	OA Articles	OA Spend	OA Articles	OA Spend	OA Articles	OA Spend	2017	2018	2019	Number of titles in offer, and brief description of each including whether hybrid or fully OA
	Insert [CONSORTIUM NAME] and totals on this line
	Insert every member of the consortium, whether or not they subscribe, on the lines below

## Sheet: All Article list
DOI	Instituion Name	Article Title	Author Full Name	Article Type	Journal Title	Journal Discipline	OA	Publication date	Corresp author ORCID	Funding statement

## Sheet: OA Article List
DOI	Institution Name	Article Title	Author Name	Article Type	Journal Title	Journal discipline (STEM/HSS)	Article license (e.g. CC BY)	Article publication date	Corresponding author ORCID	FundRef ID	Article APC fee charged to institution (excld. tax)	Article APC fee charged to institution (incld. tax)	Currency (e.g. €, $, £)	Date of APC payment	Comments
